# Supplementary material for: Anticancer drugs approved by the Food and Drug Administration for gastrointestinal malignancies: Clinical benefit and price considerations
Source: PubMed Central journal article supplement (PMC6488126; doi:10.1002/cam4.2058), 2019-03-07

A)

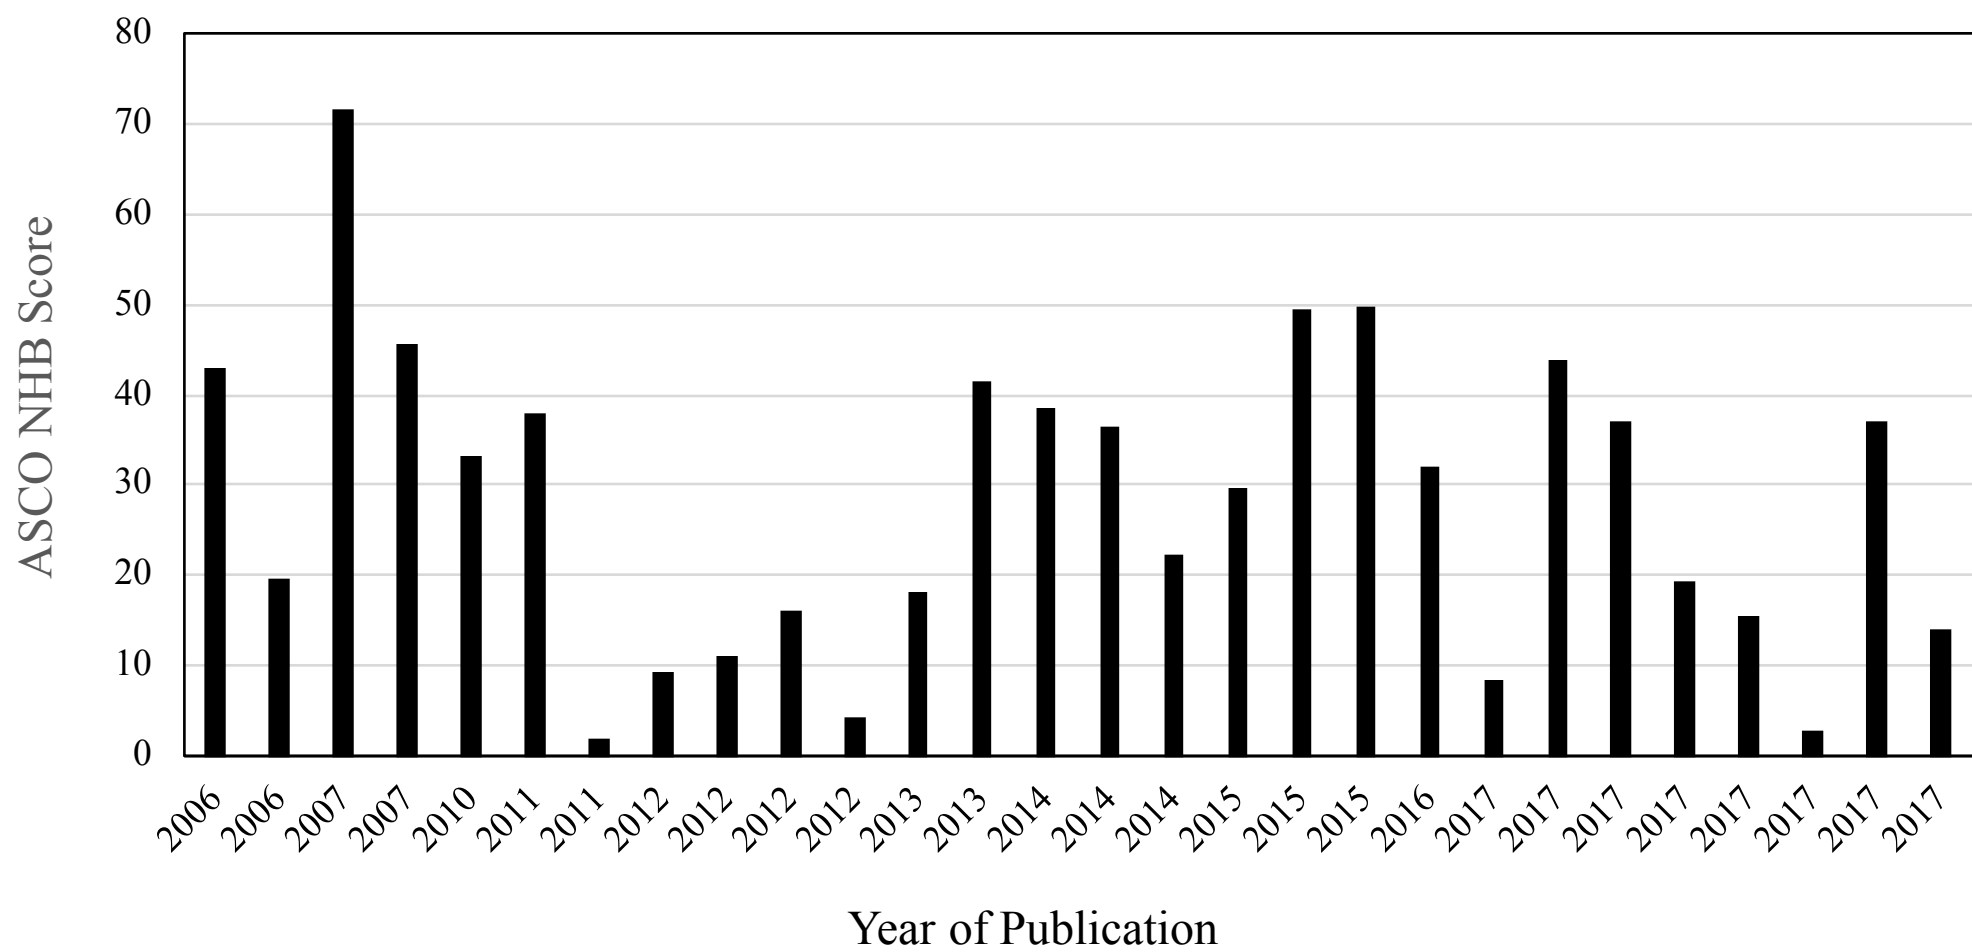

B)

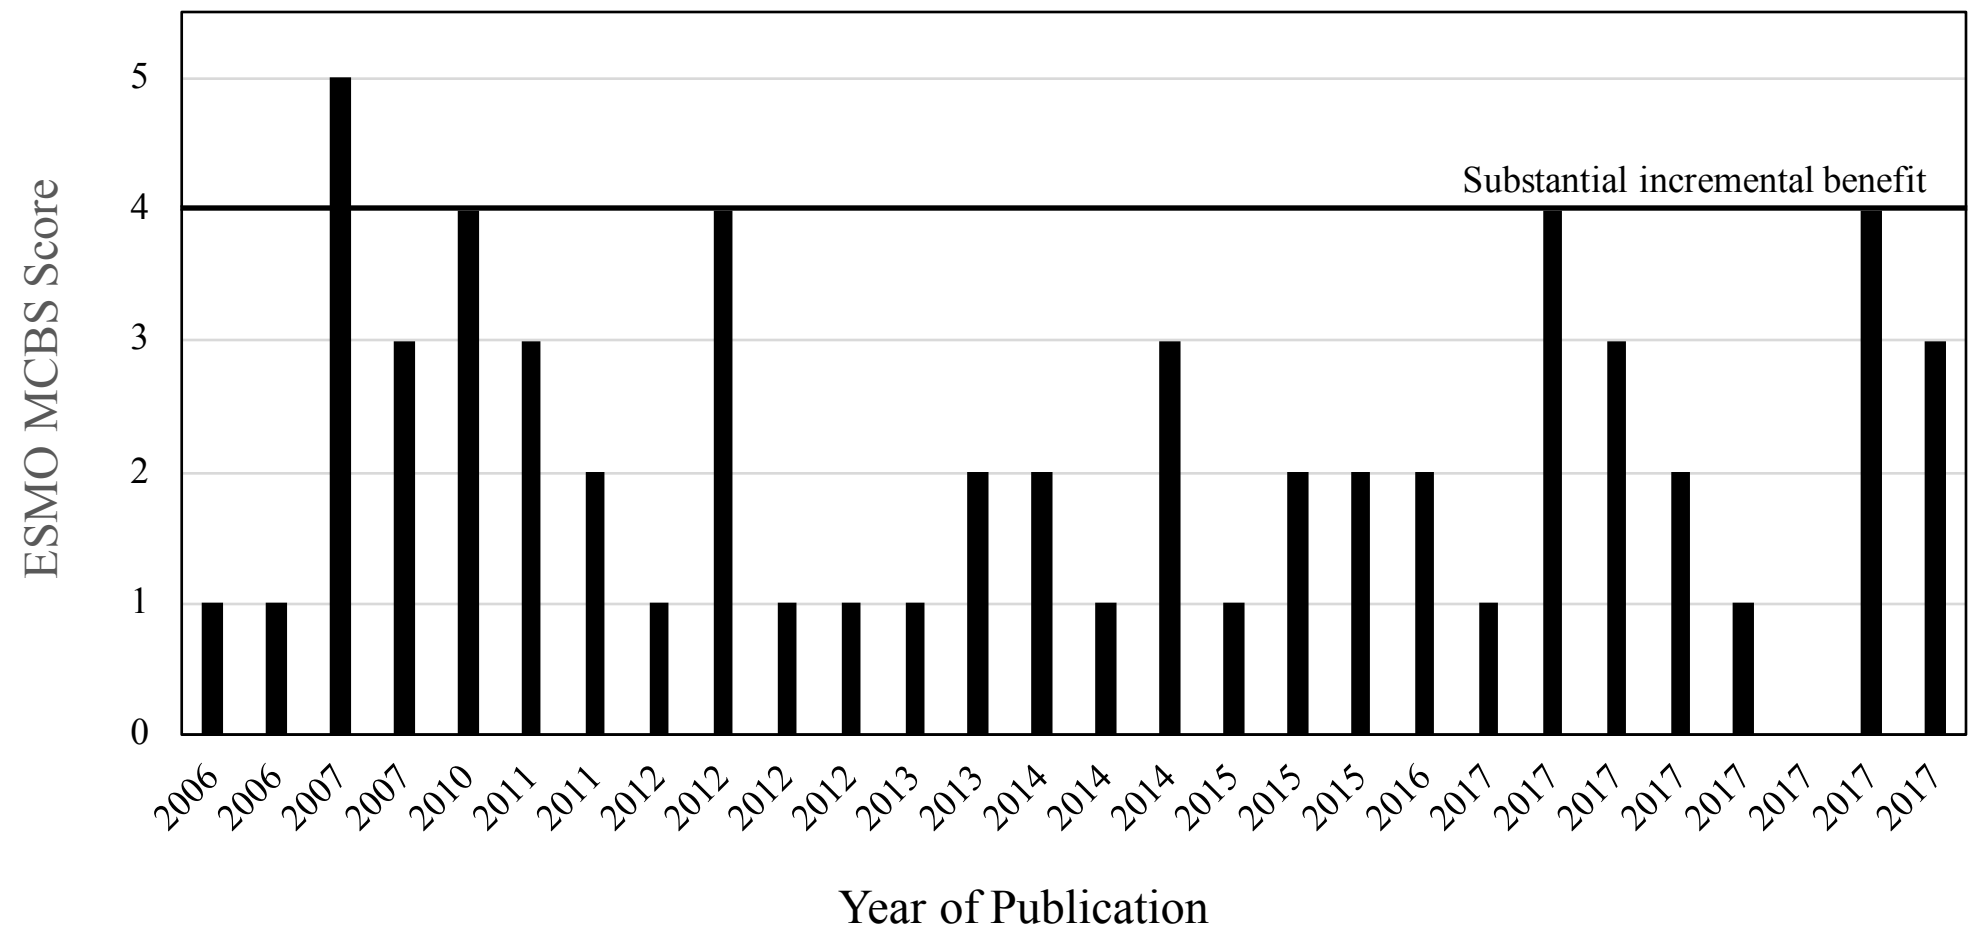

Supplement: CAM4-8-1584-s001.pdf [file CAM4-8-1584-s001.pdf]
